# Supplementary material for: A Novel Inflammatory Response-Related Gene Signature Predicts Immune Status and Prognosis of Breast Cancer
Source: J Oncol. 2022 Nov 23;2022:5468858. doi: 10.1155/2022/5468858 (PMC9711960; doi:10.1155/2022/5468858)
Supplement: Supplementary Materials — Supplementary Figure 1: identification of the candidate inflammatory response-related genes in the TCGA cohort. (A) Heatmap showed 243 DEGs between breast cancer tissues and normal tissues. (B) The association between gene expression and OS was determined by univariate Cox regression analysis in the TCGA cohort. (C) LASSO coefficient profiles of the expression of 45 OS-related genes. Supplementary Figure 2: the correlation between the risk scores and clinical characteristics. Boxplot showed the correlation between the risk score and clinical characteristics in the TCGA cohort (A), and the GSE96058 cohort (B). Supplementary Figure 3: correlation between IRGS and immune checkpoints. The expression of immune checkpoints in distinct risk groups. Supplementary Table 1: genes contained in the “GOBP_INFLAMMATORY_RESPONSE” gene set. Supplementary Table 2: genes contained in the “HALLMARK_INFLAMMATORY_RESPONSE” gene set. Supplementary Table 3: genes and corresponding COEFs in the TCGA Cohort. Supplementary Table 4: chemotherapy drugs and their correlation with IRGS genes. [file 5468858.f1.zip › Supplementary Materials/Supplementary Table 4.txt]

Supplementary Table 4: Chemotherapy drugs and their correlation with IRGS genes.
Gene	Drug	cor	p value
TSLP	Volitinib	0.764503652	1.17E-12
TSLP	PF-04217903	0.752442404	4.16E-12
RASGRP1	Nelarabine	0.744564912	9.14E-12
APOD	ARQ-680	0.741490749	1.23E-11
APOD	SB-590885	0.715027156	1.38E-10
APOD	PLX-4720	0.661440564	8.76E-09
APOD	Vemurafenib	0.653916835	1.47E-08
TSLP	EMD-1204831	0.644053126	2.83E-08
APOD	PLX-8394	0.643177814	2.99E-08
APOD	GDC-0994	0.634555385	5.20E-08
APOD	TAK-632	0.619794256	1.29E-07
APOD	Dabrafenib	0.617207354	1.50E-07
APOD	MLN-2480	0.615471454	1.67E-07
APOD	PD-98059	0.603121382	3.40E-07
APOD	BGB-283	0.596815403	4.83E-07
APOD	Varbulin	-0.591022646	6.64E-07
TSLP	SGX-523	0.571395652	1.86E-06
APOD	PD 184352	0.560439398	3.21E-06
APOD	Encorafenib	0.550764607	5.12E-06
APOD	Rigosertib	-0.542578553	7.52E-06
APOD	ulixertinib	0.540001999	8.47E-06
APOD	CC-90003	0.536443621	9.96E-06
APOD	LXH-254	0.533030646	1.16E-05
APOD	LY-3009120	0.531243128	1.26E-05
PTGER3	SR16157	0.525195603	1.64E-05
RASGRP1	Asparaginase	0.524574852	1.69E-05
APOD	AZ-628	0.519388091	2.12E-05
APOD	HYPOTHEMYCIN	0.517075264	2.34E-05
BCL6	AMONAFIDE	-0.508758622	3.32E-05
APOD	RX-5902	-0.507492912	3.49E-05
RASGRP1	Sapacitabine	0.507022353	3.56E-05
SCGB1A1	PENTOSTATIN	0.506243884	3.68E-05
SCGB1A1	XL-888	-0.506068192	3.71E-05
APOD	LY-2874455	-0.505792763	3.75E-05
PTGER3	AZD-9496	0.501402006	4.49E-05
BCL6	P-529	0.500968106	4.57E-05
TSLP	JNJ-3887618	0.498490889	5.05E-05
ANO6	XAV-939	0.494949693	5.82E-05
RASGRP1	Chelerythrine	0.493048275	6.27E-05
APOD	PYRAZOLOACRIDINE	-0.491621827	6.64E-05
APOD	BAL-101553	-0.49032589	6.98E-05
SCGB1A1	SNX-5422	-0.487001653	7.95E-05
APOD	Selumetinib	0.486827812	8.00E-05
APOD	Refametinib	0.485037668	8.58E-05
APOD	CEP-32496	0.484615519	8.72E-05
APOD	LY-3214996	0.481862139	9.69E-05
PTGER3	Selonsertib	0.47882867	0.000108778
SDC1	DACARBAZINE	-0.47869452	0.000109332
BCL6	RX-3117	-0.472032061	0.000140341
APOD	Ombrabulin	-0.465525567	0.00017822
SDC1	Arsenic trioxide	-0.465496269	0.00017841
SCG2	Sabutoclax	0.464856843	0.000182602
APOD	SCH-772984	0.463208755	0.000193825
SCGB1A1	Ganetespib	-0.462128108	0.000201523
ANO6	SHP-099	0.461113581	0.000209003
PTGER3	Varbulin	-0.46054009	0.000213343
APOD	AZD-0364	0.457191331	0.000240371
PTGER3	GDC-0810	0.456931062	0.000242598
SCGB1A1	TAK-960 analog	-0.452967745	0.000278912
BCL6	Oxaliplatin	-0.452387102	0.00028463
APOD	Lexibulin	-0.451134222	0.000297334
RASGRP1	XK-469	0.451055868	0.000298146
APOD	SB-202190	0.450450685	0.000304481
BCL6	5-aza-T-dCyd	-0.449897743	0.000310377
APOD	ARRY-162	0.448894405	0.000321341
APOD	6-(4-pyrimidinyl)-1H-indazole derivative	0.446358774	0.000350641
RASGRP1	Batracylin	0.444749777	0.000370475
SDC1	Imexon	-0.444210413	0.000377348
SCGB1A1	Mitotane	0.442678407	0.00039751
APOD	TPX-0005	-0.442552634	0.000399208
APOD	RO-5126766	0.44157853	0.000412583
ANO6	OSU-03012	-0.440824571	0.000423214
SDC1	BP-1-102	-0.438879397	0.000451802
APOD	pralatrexate	-0.438428387	0.000458676
SDC1	Nilotinib	-0.437057751	0.000480153
APOD	AS-703569	-0.435795139	0.000500742
BCL6	Pelitrexol isomer A	-0.435402594	0.000507304
APOD	Pimasertib	0.435241687	0.000510017
RASGRP1	A-1331852	0.433376369	0.000542436
BCL6	Apitolisib	0.431861018	0.000570136
BCL6	Pelitrexol isomer B	-0.430229989	0.000601379
SDC1	Chelerythrine	-0.428905464	0.000627883
RASGRP1	Navitoclax	0.428357549	0.000639153
TSLP	Pluripotin	-0.427099127	0.000665734
APOD	Bafetinib	0.425813569	0.000693917
BCL6	pralatrexate	-0.425105455	0.000709898
BCL6	XR-11576	-0.423057251	0.000758015
APOD	SAR-20347	-0.422034932	0.000783118
APOD	Cobimetinib (isomer 1)	0.417241577	0.000911133
TSLP	JNJ-38877605	0.416528623	0.000931708
SDC1	Cyclophosphamide	-0.414862301	0.000981439
SCGB1A1	CT-32228	-0.413268809	0.001031223
APOD	Rocilinostat	0.413141264	0.001035304
ANO6	By-Product of CUDC-305	-0.412726133	0.001048689
ANO6	Tamoxifen	-0.412060589	0.001070474
BCL6	VS-5584	0.411022401	0.00110527
PTGER3	KX-01	-0.410802414	0.001112773
SCG2	JNJ-26483327	-0.410696792	0.001116392
BCL6	SAR-245409	0.409217169	0.001168208
SDC1	HYPOTHEMYCIN	-0.407815232	0.00121929
BCL6	Telatinib	0.406535319	0.00126767
BCL6	CX-5461	-0.405602833	0.001303997
APOD	Denileukin Diftitox Ontak	0.405433803	0.001310681
CXCL13	Elesclomol	0.404739817	0.001338448
BCL6	MTX-211	0.40259373	0.00142769
SCGB1A1	Bortezomib	-0.401977228	0.001454295
APOD	OSI-027	0.401468652	0.001476576
SDC1	ARRY-614	-0.401248048	0.001486336
BCL6	MPC-3100	-0.399066835	0.001585998
BCL6	AT-13387	-0.397956815	0.001638982
ANO6	ARRY-520 Isomer A	-0.396727463	0.001699507
APOD	brigatinib	-0.395825532	0.001745177
ANO6	GSK-921	-0.39499563	0.001788167
ANO6	Des-fluoro-TAK-960	-0.394474616	0.001815638
SDC1	S-63845	-0.393609655	0.001862079
SCGB1A1	Dacomitinib	0.392470507	0.001924861
HYAL3	4SC-202	0.392136065	0.001943649
ANO6	BI-2536	-0.391771802	0.001964299
SCGB1A1	Luminespib	-0.390484291	0.002038868
PTGER3	Fulvestrant	0.389263465	0.002111899
SDC1	entosplenitib	0.389224524	0.002114267
BCL6	entosplenitib	0.388547154	0.002155829
BCL6	BAY-2402234	-0.38824134	0.002174832
SCGB1A1	PHA-665752	-0.387975576	0.002191466
BCL6	LY-2801653	0.386342548	0.002296198
APOD	CC-223	0.385291697	0.00236593
BCL6	Cyclophosphamide	-0.384963405	0.002388099
APOD	CX-5461	-0.384859725	0.002395138
SCGB1A1	Gefitinib	0.384747456	0.002402782
BCL6	By-Product of CUDC-305	-0.38397723	0.00245581
APOD	Rebastinib	0.383719747	0.002473768
APOD	Pelitrexol isomer B	-0.383261309	0.002506032
SCGB1A1	MPC-3100	-0.382721563	0.002544497
PTGER3	CT-32228	-0.382560593	0.00255607
SDC1	Bafetinib	-0.381691127	0.002619395
SCGB1A1	Epothilone B	-0.380545146	0.002704991
BCL6	CUDC-305	-0.379921495	0.002752611
SCGB1A1	delanzomib	-0.3791626	0.002811562
PTGER3	Rigosertib	-0.378618698	0.002854501
BCL6	Belinostat	-0.37815689	0.002891415
BCL6	METHOTREXATE	-0.377403105	0.00295258
SCGB1A1	MK-0752	0.377309398	0.002960263
SCGB1A1	AZD-3759	0.37729344	0.002961574
PTGER3	Quizartinib	0.377181851	0.00297075
ANO6	TAK Plk inhibitor	-0.376311404	0.003043203
HYAL3	AMONAFIDE	-0.374485465	0.003200306
ANO6	Volasertib	-0.374192553	0.003226166
ANO6	Docetaxel	-0.372810859	0.003350671
BCL6	IDH-C227	0.372364022	0.003391838
ANO6	DECITABINE	-0.370261996	0.003591571
RASGRP1	Bendamustine	0.370155555	0.003601956
PTGER3	pralatrexate	-0.369722847	0.00364445
CXCL13	BAY-1161909	0.369521028	0.003664421
SDC1	DMAPT	-0.369032436	0.00371317
SDC1	Ixazomib	-0.368035704	0.003814404
SDC1	MLN-2480	-0.367130496	0.00390845
APOD	Pelitrexol isomer A	-0.366551052	0.003969722
ANO6	Telatinib	0.366257211	0.004001116
HYAL3	ETHINYL ESTRADIOL	0.366197379	0.004007536
APOD	RO-4987655	0.364627858	0.004179216
APOD	RX-3117	-0.364472249	0.004196586
TSLP	LY-3214996	-0.363809182	0.004271318
SDC1	ZM-336372	-0.360867406	0.004617236
SCGB1A1	PF-4942847	-0.360375622	0.004677412
BCL6	LY-3023414	0.359420706	0.004796237
SCGB1A1	MLN-0905	-0.359143471	0.00483123
APOD	SCH-1473759	-0.35832743	0.004935538
BCL6	Cilengitide	0.358192389	0.004952989
BCL6	E-7820	-0.358141479	0.004959582
ANO6	GSK-461364	-0.357789488	0.005005379
SCGB1A1	Vismodegib	-0.356421476	0.005186922
ANO6	EMD-534085	-0.356287263	0.005205041
ANO6	NTRC-0066-0	-0.355615783	0.005296532
APOD	Pyrazoloacridine	-0.355565659	0.005303418
SCGB1A1	Ixazomib citrate	-0.355310764	0.005338556
TSLP	Trametinib	-0.355014172	0.005379701
SDC1	Carmustine	-0.3544786	0.005454704
BCL6	SAR-260301 (enantiomer 1)	0.353896418	0.005537275
APOD	Batracylin	-0.353529442	0.005589886
TSLP	ST-3595	0.353503736	0.005593588
BCL6	TP-0903	-0.353435318	0.005603451
APOD	ARRY-614	0.352954717	0.005673164
BCL6	BLU-667	0.352717387	0.005707869
PTGER3	IACS-10759	0.352142069	0.005792775
APOD	umbralisib	-0.352057462	0.005805355
SDC1	Nelarabine	-0.351864969	0.005834064
PTGER3	Acetalax	0.351520257	0.005885788
APOD	ON-123300	-0.351241735	0.005927873
PTGER3	BAY-1125976	0.351118172	0.005946628
TSLP	ARRY-704	-0.350425601	0.006052718
RASGRP1	Fluphenazine	0.350368564	0.006061528
TSLP	Cobimetinib (isomer 1)	-0.350055411	0.006110102
APOD	PQR-309	0.34967217	0.006170011
HYAL3	MI-219	-0.349602639	0.006180936
APOD	Pp-242	0.349558192	0.006187928
BCL6	Bosutinib	-0.349189931	0.006246128
BCL6	PKM2 (9)	0.349161368	0.006250662
ANO6	TAS-6417	0.348549531	0.00634848
BCL6	PQR-620	0.348496066	0.006357091
PTGER3	ARQ-092	0.34834728	0.006381109
RASGRP1	CNDAC	0.347912629	0.006451728
APOD	E-7449	-0.347336934	0.006546317
ANO6	Rapamycin	0.347044176	0.006594882
APOD	BAY-2402234	-0.346577026	0.00667303
ANO6	Ixabepilone	-0.346540044	0.006679251
CXCL13	BAY-1217389	0.346475528	0.006690116
BCL6	Luminespib	-0.346335003	0.006713835
PTGER3	ABL-001	0.345879229	0.006791272
PTGER3	Sonidegib	0.345776402	0.00680885
SDC1	Bortezomib	-0.345659568	0.006828871
CXCL13	sr 13654	0.345568414	0.006844527
CXCL13	5-aza-T-dCyd	0.345289825	0.006892571
ANO6	Deforolimius	0.3447846	0.006980452
SDC1	Ifosfamide	-0.34461496	0.007010179
BCL6	ST-3595	-0.344477456	0.007034355
APOD	BLU-667	-0.344453869	0.00703851
BCL6	OSI-027	0.343647501	0.007181836
SDC1	Vorinostat	-0.343319228	0.007240911
BCL6	GSK-2126458	0.343229064	0.007257211
APOD	ABC-1183	-0.343028069	0.007293662
RASGRP1	Dexamethasone Decadron	0.342871578	0.007322153
RASGRP1	GSK-690693	0.342273376	0.00743196
SCGB1A1	PD183805	0.341625545	0.007552496
APOD	PD-0325901	0.341161103	0.007639958
APOD	Sabutoclax	-0.340948932	0.007680206
BCL6	JNJ-38877605	0.340901195	0.007689288
BCL6	IDH1-Comp 301	0.340871902	0.007694865
BCL6	AZD-8186	0.340636984	0.007739718
APOD	LY-2606368	-0.339621403	0.007936263
RASGRP1	I-BET-762	-0.339537033	0.007952785
APOD	Docetaxel	-0.339181401	0.008022758
BCL6	AZD-5363	0.339168421	0.008025322
BCL6	Okadaic acid	0.338997843	0.008059084
ANO6	DOLASTATIN 10	-0.338789006	0.008100587
BCL6	Pyrazoloacridine	-0.338711838	0.00811597
ANO6	P-529	0.338042691	0.008250432
APOD	R-306465	0.337961641	0.008266849
APOD	TAK-733	0.337651919	0.00832985
CXCL13	Mitomycin	0.337561609	0.008348298
APOD	Abexinostat	0.33754521	0.008351652
BCL6	AZD-3965	-0.337449321	0.008371286
BCL6	GDC-0084	0.33708414	0.008446428
APOD	Okadaic acid	0.336895185	0.008485538
RASGRP1	napabucasin	-0.336873897	0.008489954
ANO6	YK-4-279	-0.33680244	0.008504792
SDC1	BAY-1816032	-0.336104003	0.008651017
TSLP	LMP-400	0.335756912	0.008724495
BCL6	MK-0429	0.335478433	0.008783839
SCGB1A1	Erlotinib	0.335181481	0.008847507
SCG2	CEP-9722	-0.335176815	0.008848511
BCL6	GDC-0349	0.334949651	0.008897491
BCL6	Quizartinib	0.334605609	0.008972122
BCL6	8-Chloro-adenosine	-0.334540116	0.00898639
SDC1	BGB-283	-0.334311199	0.009036418
APOD	Pracinostat	0.333936774	0.009118766
BCL6	GS-9901	0.333814259	0.009145853
ANO6	GNE-617	-0.333037175	0.009319289
BCL6	Idelalisib	0.332101998	0.009531793
SCGB1A1	TAK Plk inhibitor	-0.332063627	0.009540601
APOD	6-Bromoindirubin-3'-Acetoxime	-0.332007268	0.009553552
APOD	Buparlisib	0.331852074	0.009589292
SDC1	BLU-667	0.331832102	0.009593899
APOD	dimethylfasudil	-0.330562072	0.009890889
BCL6	Ganetespib	-0.330235382	0.009968561
ANO6	BAY-1161909	-0.329968511	0.010032403
BCL6	CC-115	0.329887168	0.010051932
APOD	Vorinostat	0.329807892	0.010070997
PTGER3	brigatinib	-0.329435573	0.010160956
PTGER3	PKM2 (9)	0.329059037	0.010252642
APOD	1,9-Pyrazoleanthrone	-0.328835878	0.010307318
PTGER3	BAL-101553	-0.32837199	0.010421784
BCL6	RH1	-0.328331238	0.010431892
BCL6	Zoledronate	0.328226456	0.010457921
BCL6	Deforolimius	0.328206237	0.01046295
BCL6	Palbociclib	-0.327736055	0.010580492
APOD	Floxuridine	-0.327716529	0.010585399
SDC1	INK-128	0.327643477	0.010603771
TSLP	BMN-673	0.327565956	0.010623297
APOD	RG-7741	-0.32682444	0.010811651
RASGRP1	IACS-8968	0.326757727	0.010828738
APOD	PF-03758309	0.326485918	0.010898596
RASGRP1	ST-3595	0.326105346	0.010997063
PTGER3	AZD-3229	0.325935734	0.011041195
APOD	serabelisib	0.325489155	0.011158126
ANO6	AZD-5363	0.325433188	0.011172855
ANO6	VINORELBINE	-0.325160038	0.011244984
TSLP	Nelarabine	0.32497017	0.011295359
SCG2	Osimertinib	-0.324823949	0.011334286
BCL6	serabelisib	0.324386083	0.011451549
SCGB1A1	JNJ-26483327	0.324041706	0.011544511
BCL6	B-7100	-0.323928872	0.011575111
APOD	Adavosertib	-0.323796264	0.011611163
SCGB1A1	Ixabepilone	-0.323730742	0.011629013
RASGRP1	ABT-737	0.323664947	0.01164696
BCL6	Nilotinib	-0.32338379	0.011723924
TSLP	MGCD-265	0.323336344	0.011736955
SCGB1A1	Nelfinavir	-0.323227436	0.011766914
BCL6	ZSTK-474	0.322885526	0.011861398
HYAL3	AMG-232	-0.322768934	0.011893766
APOD	AZD-3147	0.322541635	0.011957089
APOD	ITRI-260	-0.322154885	0.012065502
BCL6	3-Bromopyruvate (acid)	-0.321524069	0.012244151
HYAL3	RX-5902	0.32120302	0.012335946
BCL6	PF-04691502	0.321177031	0.012343403
HYAL3	Tipifarnib	0.321012966	0.012390566
BCL6	Cabozantinib	0.320997903	0.012394905
SCGB1A1	Sapitinib	0.320527172	0.012531129
BCL6	LY-2606368	-0.320373496	0.01257588
CXCL13	CCT-271850	0.320372111	0.012576284
PTGER3	Eribulin mesilate	-0.320270627	0.012605912
RASGRP1	Danusertib	-0.320225134	0.012619214
RASGRP1	AZD-4320	0.320220118	0.012620681
TSLP	TAK-733	-0.320123307	0.01264903
SDC1	delanzomib	-0.319638712	0.012791759
APOD	LMP776	-0.319181764	0.012927615
CXCL13	Brivanib	0.318747932	0.013057746
APOD	NMS-1286937	-0.318438183	0.013151347
APOD	Hydrastinine HCl	0.3183351	0.013182624
TSLP	SCH-772984	-0.318025747	0.013276874
SDC1	spebrutinib	0.317941095	0.013302765
SDC1	AZD-5991	-0.317917103	0.013310111
ANO6	ARQ-621	-0.317684284	0.013381579
SCGB1A1	Ixazomib	-0.317491541	0.013440994
CXCL13	AMG-900	0.317351438	0.013484324
BCL6	Motesanib	0.317194561	0.013532986
ANO6	JNJ-3887618	0.317075903	0.013569892
APOD	PQR-620	0.315466951	0.014078938
ANO6	IDH-C227	0.315343015	0.014118821
BCL6	Nitrogen mustard	-0.315051612	0.014212979
ANO6	PKM2 (9)	0.314853148	0.014277414
APOD	ARV-825	-0.314751627	0.014310472
RASGRP1	PX-316	0.314597788	0.014360692
ANO6	Raloxifene	-0.314430889	0.014415345
ANO6	GSK-295	-0.31426874	0.014468614
BCL6	BAY-1143572	0.314220271	0.01448457
APOD	SOMCL-12-81	-0.313643908	0.014675468
TSLP	Fluphenazine	0.313548718	0.014707203
APOD	Alisertib	-0.313177332	0.014831581
ANO6	Ispinesib	-0.312705987	0.014990734
SCGB1A1	Midostaurin	-0.312491623	0.015063599
BCL6	INK-128	0.312428931	0.015084966
HYAL3	ABC-1183	0.312358754	0.015108915
SDC1	Kahalide F	0.312268558	0.015139744
BCL6	PQR-309	0.312063071	0.01521018
ANO6	PRN-1371	0.311583042	0.015375819
PTGER3	Sunitinib	-0.311392524	0.015441986
SDC1	Lomustine	-0.311299548	0.015474365
ANO6	sr 13654	-0.31129646	0.015475442
APOD	Fedratinib	-0.311049384	0.015561775
CXCL13	Idarubicin	0.310870033	0.015624702
RASGRP1	Lapachone	-0.310834154	0.015637317
SCG2	EXEL-7647	-0.310821466	0.01564178
APOD	MTX-211	0.31076367	0.015662123
PTGER3	CP-724714	0.3103253	0.015817165
CXCL13	1,9-Pyrazoleanthrone	0.310278912	0.015833648
APOD	CC-115	0.310154857	0.015877801
ANO6	JNJ-38877605	0.309540025	0.016098186
PTGER3	S-222611	0.309223405	0.016212696
HYAL3	(-)-Nutlin-3	-0.309043114	0.016278212
SCG2	Varlitinib	-0.309017634	0.016287489
ANO6	KX-01	-0.308929559	0.016319592
APOD	AZD-7762	-0.308799992	0.016366918
APOD	CYC-116	-0.308771608	0.016377301
RASGRP1	7-Hydroxystaurosporine	0.308687226	0.016408202
ANO6	RAPAMYCIN	0.308317537	0.016544173
APOD	ST-3595	-0.308097442	0.01662558
TSLP	LY-3009120	-0.307827824	0.016725771
TSLP	AZD-1208	0.307649173	0.016792442
PTGER3	LY-2606368	-0.307615757	0.016804938
BCL6	enantiomer of PF-4176340	0.307397993	0.016886565
SCGB1A1	CUDC-305	-0.307314256	0.016918043
SCGB1A1	Vandetanib	0.307312743	0.016918612
APOD	AM-5992	-0.307206941	0.016958458
APOD	BAY 61-3606	-0.306997103	0.017037721
APOD	ARRY-704	0.306560765	0.017203556
HYAL3	RG-7388	-0.306427875	0.017254335
SCGB1A1	Ibrutinib	0.306397296	0.017266038
TSLP	LXS-196	-0.306394299	0.017267185
SCGB1A1	Ezatiostat	-0.306224972	0.017332114
TSLP	Pimasertib	-0.306148279	0.017361591
RASGRP1	Tanespimycin	-0.306065486	0.01739346
BCL6	DECITABINE	-0.305857629	0.01747369
RASGRP1	LY-3009120	-0.305741946	0.017518479
ANO6	BLU-667	0.305713124	0.017529653
SCGB1A1	Poziotinib	0.305654062	0.01755257
TSLP	Neratinib	-0.305629138	0.017562249
SDC1	Alisertib	0.304302616	0.018083988
CXCL13	Dabrafenib	0.304171689	0.018136193
ANO6	VX-944	-0.303698697	0.018325862
BCL6	M2698	0.303592531	0.018368666
SCG2	Bosutinib	-0.303397206	0.018447639
APOD	XL-019	-0.30325854	0.01850388
BCL6	AZD-3147	0.30315235	0.018547048
SDC1	ONX-0914	-0.30309701	0.018569579
SDC1	ARQ-680	-0.302853575	0.018668965
BCL6	OSU-03012	-0.302637707	0.018757475
CXCL13	AZACITIDINE	0.302547501	0.018794568
HYAL3	CGM-097	-0.302527259	0.018802899
SCG2	zanubrutinib	-0.302284036	0.018903261
PTGER3	Staurosporine	-0.302196813	0.018939363
SCG2	Okadaic acid	0.301973439	0.019032085
APOD	OSU-03012	-0.301835354	0.019089597
SCGB1A1	PF-06747775	0.301673788	0.019157077
SCG2	Poziotinib	-0.301619144	0.019179946
BCL6	sr 13654	-0.301351468	0.019292305
APOD	sr 13654	-0.301159652	0.019373165
PTGER3	BYL-719	0.300743065	0.019549771
TSLP	CC-90003	-0.300506669	0.019650595
SCGB1A1	ONX-0914	-0.300229217	0.019769494
TSLP	AZD-0364	-0.300105601	0.019822665
ANO6	spebrutinib	0.299992625	0.019871365
SDC1	BMS-690514	0.299966911	0.019882464
SCGB1A1	AT-13387	-0.299701097	0.019997504
ANO6	CC-115	0.299646193	0.020021336
SCG2	Pipamperone	0.298365366	0.020584189
TSLP	RO-4987655	-0.297763331	0.020853358
RASGRP1	ZM-336372	0.297614747	0.020920247
APOD	BMS-690514	-0.297557089	0.020946252
APOD	VE-821	-0.297142979	0.021133835
APOD	Apitolisib	0.297078411	0.021163211
SDC1	Everolimus	0.296959756	0.021217284
BCL6	PYRAZOLOACRIDINE	-0.296825398	0.021278656
BCL6	AZD-3229	0.296561231	0.021399759
APOD	GDC-0084	0.296367845	0.021488784
TSLP	EMD-1214063	0.296127679	0.021599782
SCGB1A1	LOR-253	0.296018658	0.021650328
TSLP	AZD-3463	-0.295696756	0.02180016
APOD	GNE-140	-0.295694354	0.021801281
SCG2	EGF-816	-0.295686039	0.021805163
CXCL13	BOS-172722	0.295678082	0.021808879
CXCL13	AMONAFIDE	0.295566351	0.021861107
HYAL3	Okadaic acid	0.295469245	0.021906586
ANO6	Sapitinib	0.294967299	0.022142945
SCG2	PF-03758309	0.294785363	0.022229148
ANO6	Tanespimycin	-0.294588301	0.022322838
BCL6	Ifosfamide	-0.294362453	0.022430625
BCL6	6-(4-pyrimidinyl)-1H-indazole derivative	0.294223539	0.022497141
SCGB1A1	Alvespimycin	-0.294056909	0.022577148
SCGB1A1	geldanamycin analog	-0.293943054	0.022631954
ANO6	CEP-37440	-0.293906809	0.022649424
ANO6	Simvastatin	0.293535626	0.022828998
SCG2	Neratinib	-0.293278821	0.022953941
BCL6	AMG-511	0.293265402	0.022960486
TSLP	PD-0325901	-0.293090267	0.023046045
BCL6	DMAPT	-0.29301266	0.023084045
BCL6	Abiraterone	0.292942118	0.023118632
SCGB1A1	BMS-599626	0.292713046	0.023231248
HYAL3	milademetan	-0.292597719	0.02328812
HYAL3	TESTOLACTONE	0.292232568	0.023468967
ANO6	Poziotinib	0.29211758	0.023526162
SDC1	SB-590885	-0.292054749	0.023557464
TSLP	RO-5126766	-0.292002966	0.023583288
BCL6	Dexrazoxane	-0.291922632	0.023623398
TSLP	MITOXANTRONE	0.291820645	0.023674402
SCGB1A1	EGF-816	0.291797111	0.023686185
APOD	PWT-33597	0.29175091	0.02370933
ANO6	Paclitaxel	-0.291225434	0.023973929
CXCL13	DECITABINE	0.291200681	0.023986454
BCL6	CEP-9722	-0.290957558	0.024109772
BCL6	IACS-8968	0.290646037	0.024268565
ANO6	Brivanib	-0.290437168	0.024375527
SDC1	Pipamperone	-0.290391979	0.02439872
SCGB1A1	Varlitinib	0.290318893	0.024436271
TSLP	CO-1686	-0.2901272	0.024534994
SDC1	AZ-628	-0.28981941	0.02469421
ANO6	Motesanib	0.289562606	0.024827718
BCL6	LY-294002	0.289286686	0.024971843
APOD	8-Chloro-adenosine	-0.289255383	0.024988238
SCG2	8-Chloro-adenosine	-0.289054828	0.025093496
BCL6	XL-888	-0.28865625	0.025303794
BCL6	PI-103	0.288572086	0.02534839
BCL6	BAY-1082439	0.288283143	0.025501996
TSLP	ulixertinib	-0.2882435	0.025523132
APOD	Trametinib	0.288088118	0.025606117
ANO6	Litronesib	-0.287946604	0.025681893
ANO6	Vinorelbine	-0.287612367	0.025861617
APOD	GDC-0349	0.287428918	0.025960709
SCGB1A1	SW-044248	0.28737587	0.025989423
SCGB1A1	B-7100	-0.287249236	0.026058076
APOD	MITOXANTRONE	-0.287228588	0.026069285
HYAL3	PTC-691	0.28702537	0.026179816
SDC1	Ixazomib citrate	-0.286964027	0.026213258
PTGER3	Afuresertib	0.286765473	0.026321749
BCL6	CH-5132799	0.286748506	0.026331038
PTGER3	Bisacodyl, active ingredient of Viraplex	0.286615173	0.026404126
SCGB1A1	Lapatinib	0.286138427	0.026666856
SCG2	AEE-788	-0.286110937	0.026682072
APOD	ABT-199	0.285951016	0.026770737
TSLP	Cisplatin	0.285944606	0.026774296
BCL6	AZD-8055	0.285812684	0.026847632
ANO6	NMS-1286937	-0.285609768	0.026960763
RASGRP1	Dexrazoxane	0.285536959	0.027001453
BCL6	AZD-0156	0.285385047	0.027086518
SDC1	SNX-5422	-0.285383785	0.027087226
SCGB1A1	DAUNORUBICIN	-0.285161796	0.027211939
CXCL13	CNDAC	0.284987313	0.027310301
ANO6	zanubrutinib	0.2848497	0.027388089
ANO6	TAK-960 analog	-0.284820841	0.027404426
ANO6	Oxaliplatin	-0.284664974	0.027492801
ANO6	MK-2461	0.284178269	0.027770302
APOD	Quisinostat	0.284140873	0.027791721
RASGRP1	pyridoclax	0.283903377	0.027928071
BCL6	BP-1-102	-0.28388538	0.027938426
APOD	Dasatinib	-0.283833571	0.027968255
APOD	Digoxin	-0.283497074	0.02816264
BCL6	Pp-242	0.28349046	0.028166472
SDC1	Ombrabulin	0.283290007	0.028282819
BCL6	CC-671	-0.283223083	0.028321752
TSLP	Bosutinib	-0.283043166	0.028426644
SCG2	RX-3117	-0.282857026	0.028535507
BCL6	Rapamycin	0.282446672	0.028776735
BCL6	CCT-251545	-0.282243186	0.028896987
BCL6	IPI-145	0.282154592	0.028949474
SDC1	Itraconazole	0.281933155	0.029081013
ANO6	METHOTREXATE	-0.281716438	0.029210233
HYAL3	Rigosertib	0.281698243	0.029221104
ANO6	PF-2771	-0.281439707	0.029375936
ANO6	CCT-128930	0.281390304	0.0294056
SDC1	TAK-632	-0.281255004	0.029486972
CXCL13	Pipobroman	0.281236163	0.029498318
PTGER3	RG-7741	-0.281180614	0.029531791
SDC1	EGF-816	0.281016268	0.02963101
PTGER3	GSK-461364	-0.280989328	0.029647301
SCGB1A1	Neratinib	0.280787457	0.029769613
PTGER3	AS-703569	-0.280492281	0.029949218
SCG2	Dasatinib	-0.280365024	0.030026929
SCG2	CCT-251545	-0.280297682	0.03006812
SDC1	SHP-099	0.280266383	0.030087281
SCG2	Acalabrutinib	-0.280248725	0.030098096
BCL6	VX-944	-0.280073381	0.030205661
SCGB1A1	Fenretinide	-0.280073255	0.030205738
SCGB1A1	AEE-788	0.279159448	0.030771536
APOD	Crenolanib	-0.279041983	0.030844905
APOD	KX-01	-0.278951735	0.030901374
ANO6	JNJ-54302833	-0.278572202	0.031139795
CXCL13	GNE-617	0.278457896	0.031211903
APOD	VS-5584	0.278339404	0.031286798
ANO6	AMG-900	-0.27833703	0.0312883
RASGRP1	Arsenic trioxide	0.278174763	0.031391111
SDC1	AZD-4320	-0.277908314	0.031560544
APOD	FT-1518	0.277805781	0.031625947
ANO6	Barasertib	-0.277735042	0.031671136
ANO6	Vinblastine	-0.277690776	0.03169944
SDC1	ABT-199	-0.277526181	0.031804872
PTGER3	nedisertib	0.277457426	0.031849
SDC1	XK-469	-0.277303221	0.031948156
SCGB1A1	TAS-116	-0.277111177	0.032072004
SCG2	Pelitrexol isomer A	-0.276889163	0.032215679
BCL6	Tandutinib	0.276476472	0.032484174
APOD	RAF-265	0.276458296	0.032496042
APOD	PF-477736	-0.276088286	0.032738429
CXCL13	TAK-632	0.276043749	0.032767706
SCGB1A1	Vincristine	-0.275984466	0.03280671
ANO6	SAR-245409	0.275859142	0.032889291
BCL6	AFP464	-0.275852837	0.03289345
APOD	BI-2536	-0.275805861	0.032924452
CXCL13	Cytarabine	0.27563547	0.033037109
APOD	Entinostat	0.275353157	0.033224472
CXCL13	Amonafide	0.275339296	0.033233694
TSLP	CEP-32496	-0.274931424	0.033506012
SCGB1A1	MG-132	-0.274191442	0.03400481
SCG2	Pelitrexol isomer B	-0.274111556	0.034059026
APOD	Bortezomib	0.274095659	0.034069823
SDC1	Bendamustine	-0.27394373	0.034173159
ANO6	Ibrutinib	0.273792112	0.034276543
CXCL13	XL-019	0.273611206	0.034400238
SDC1	brigatinib	0.273299327	0.034614359
RASGRP1	Bet-BAY-002	-0.273237345	0.034657044
ANO6	AZD-0156	0.273140587	0.034723767
RASGRP1	Afuresertib	0.27310455	0.034748644
CXCL13	By-Product of CUDC-305	0.272977448	0.034836506
CXCL13	AT-13387	0.272793269	0.034964151
APOD	Plinabulin	-0.272778605	0.03497433
PTGER3	AZD-3965	0.272564124	0.035123502
SDC1	Selumetinib	-0.272531248	0.035146414
ANO6	BMS-387032	-0.272385392	0.035248214
ANO6	OSI-027	0.272315375	0.03529717
RASGRP1	entosplenitib	-0.272189408	0.035385386
SCGB1A1	EXEL-7647	0.271396807	0.035944673
SDC1	Dasatinib	0.271387066	0.035951592
PTGER3	AMINOFLAVONE	0.271272323	0.036033176
BCL6	MK-2206	0.271211897	0.036076202
ANO6	IDH1-Comp 301	0.271028985	0.036206703
RASGRP1	Chlorambucil	0.27062543	0.036496011
BCL6	AM-5992	-0.270617318	0.036501846
CXCL13	Fluorouracil	0.270412202	0.036649646
CXCL13	NTRC-0066-0	0.270410332	0.036650996
CXCL13	tfdu	0.26997754	0.036964492
CXCL13	Tanespimycin	0.269842992	0.037062405
HYAL3	AMINOFLAVONE	-0.269436493	0.037359528
APOD	altiratinib	0.269111526	0.037598474
CXCL13	Gemcitabine	0.268880569	0.037769064
CXCL13	PLX-4720	0.268806717	0.037823748
CXCL13	PYRAZOLOACRIDINE	0.268536223	0.038024596
BCL6	spebrutinib	0.268381593	0.038139808
PTGER3	Crenolanib	-0.268287329	0.038210185
PTGER3	Dovitinib	-0.268196466	0.038278124
HYAL3	Fostamatinib	0.268130501	0.038327509
ANO6	Pp-242	0.268100416	0.03835005
BCL6	PF-4989216	0.267967237	0.038449965
APOD	GSK-461364	-0.267835175	0.038549255
TSLP	ARRY-162	-0.267626843	0.038706318
HYAL3	Quercetin	0.267609447	0.038719457
SCG2	olmutinib	-0.267537784	0.038773622
SCGB1A1	Homoharringtonine	-0.26752023	0.038786899
SDC1	AMG-176	-0.267352408	0.038914025
PTGER3	Imatinib	0.267232624	0.039004972
BCL6	Lapatinib	-0.267142862	0.03907324
CXCL13	Raltitrexed	0.267122441	0.039088786
APOD	PF-04691502	0.267085001	0.039117299
ANO6	M2698	0.266869942	0.039281416
ANO6	Benzimate	-0.266852507	0.039294746
SDC1	Sapitinib	0.266667873	0.039436139
SDC1	Irofulven	0.26652196	0.039548176
ANO6	TP-0903	-0.266493658	0.039569938
SCG2	Erlotinib	-0.266447775	0.039605239
SDC1	ARSENIC TRIOXIDE	-0.266444226	0.03960797
RASGRP1	umbralisib	0.266330917	0.039695263
RASGRP1	KX-01	-0.266234677	0.039769531
SDC1	ABL-001	-0.266213854	0.039785616
RASGRP1	FENRETINIDE	0.266058932	0.039905449
RASGRP1	Digoxin	0.266038086	0.039921596
APOD	AZD-2014	0.265996386	0.039953913
APOD	BAY-1251152	-0.265856839	0.040062218
SCG2	Dacomitinib	-0.265765992	0.040132856
BCL6	6-MERCAPTOPURINE	-0.265685991	0.040195146
CXCL13	Acrichine	0.265666695	0.040210182
APOD	Palbociclib	-0.265562153	0.040291725
ANO6	AZD-3759	0.265286892	0.040507083
RASGRP1	BPTES	-0.265146485	0.040617301
TSLP	BMS-777607	0.265129655	0.040630529
TSLP	SOMCL-12-81	0.265024439	0.040713306
RASGRP1	geldanamycin analog	-0.264778697	0.040907182
BCL6	PQR-530	0.264775245	0.040909911
APOD	MK-2461	-0.264713627	0.040958646
SCG2	Pimozide	-0.264600464	0.041048273
APOD	SAR-402674	-0.264475478	0.041147453
HYAL3	RG-7112	-0.26429571	0.04129045
SCGB1A1	PF-03758309	-0.26428651	0.041297779
SDC1	TPX-0005	0.26412984	0.041422756
SDC1	CEP-32496	-0.263922272	0.041588814
RASGRP1	CC-90003	-0.263824135	0.041667516
CXCL13	MPC-3100	0.263694046	0.041772032
ANO6	MK-0731	-0.263509718	0.041920494
TSLP	Melphalan	0.263427338	0.041986985
SDC1	Poziotinib	0.263301083	0.042089058
SCGB1A1	Osimertinib	0.263243222	0.042135905
BCL6	Dromostanolone Propionate	-0.263198608	0.042172056
ANO6	enantiomer of PF-4176340	0.263145717	0.042214946
PTGER3	PF-6459988	0.263120572	0.04223535
CXCL13	RX-3117	0.263068798	0.042277386
CXCL13	TAS-116	0.263065807	0.042279816
HYAL3	O-6-Benzylguanine	0.263065649	0.042279944
CXCL13	Daporinad	0.263047714	0.042294515
RASGRP1	Gefitinib	0.262972479	0.042355682
TSLP	Idarubicin	0.262965054	0.042361722
APOD	BMN-673	-0.262559684	0.042692587
BCL6	Hydroxyurea	-0.262440536	0.042790239
HYAL3	PF-2771	0.262384926	0.042835879
ANO6	VS-5584	0.262336095	0.042875989
ANO6	Varlitinib	0.262323253	0.042886542
ANO6	Nelfinavir	-0.262306057	0.042900678
BCL6	Pelitrexol	-0.262259499	0.042938967
CXCL13	P-529	-0.262243581	0.042952065
BCL6	Parthenolide	-0.262138471	0.043038633
SCGB1A1	Paclitaxel	-0.26172789	0.043378164
BCL6	Sapacitabine	-0.261727613	0.043378393
SCG2	I-BET-151	-0.261462283	0.043598979
SDC1	S-64315	-0.26114221	0.043866303
PTGER3	RAF-265	-0.2610513	0.043942476
ANO6	PD183805	0.260582329	0.044337154
BCL6	Perifosine	-0.260507894	0.044400064
BCL6	Irofulven	0.26041565	0.044478128
BCL6	Fluphenazine	-0.26018889	0.044670509
ANO6	WORTMANNIN	0.260019418	0.044814733
SCG2	ARQ-087	-0.259959856	0.044865511
BCL6	A-1210477	0.259928623	0.044892158
HYAL3	VT-464	-0.259712054	0.045077281
ANO6	BAY-1816032	-0.259688262	0.045097656
APOD	GSK-1070916	-0.259541806	0.045223248
SCG2	ICG-001	0.259478176	0.045277903
BCL6	PF-4942847	-0.259302831	0.045428795
TSLP	SNS-314	0.259275785	0.045452106
TSLP	Afatinib	-0.259181093	0.045533798
SCG2	BMS-986158	-0.259083732	0.045617919
BCL6	Buthionine sulphoximine	-0.259039281	0.045656367
CXCL13	Celecoxib	-0.259000998	0.045689502
TSLP	Raltitrexed	0.258605908	0.046032614
RASGRP1	ONX-0801	-0.258509551	0.046116614
PTGER3	AZD-8835	0.258492365	0.046131609
SDC1	BN-2629	-0.258404886	0.046207999
SCG2	PD183805	-0.258384901	0.046225465
CXCL13	PF-06873600	0.258359014	0.046248098
TSLP	Indibulin	0.258275534	0.046321143
SCG2	AZD-3759	-0.258266387	0.046329153
TSLP	Irinotecan	0.258224791	0.04636559
ANO6	LDK-378	-0.25821585	0.046373426
TSLP	GDC-0994	-0.258210156	0.046378416
BCL6	JNJ-3887618	0.257797251	0.046741474
APOD	Clofarabine	-0.257715575	0.046813564
SDC1	GSK-2636771	0.257690911	0.046835352
BCL6	1,9-Pyrazoleanthrone	-0.25752006	0.046986505
TSLP	BGB-283	-0.25740825	0.04708564
CXCL13	CFI-402257	0.257141182	0.047323127
BCL6	Allopurinol	-0.256978515	0.047468257
SCGB1A1	Volasertib	-0.256937619	0.047504801
SDC1	Imatinib	-0.256904267	0.04753462
BCL6	Pazopanib	0.256711344	0.047707413
SCGB1A1	Etoposide	-0.256665047	0.047748956
BCL6	Bisacodyl, active ingredient of Viraplex	0.256612305	0.047796318
CXCL13	DOLASTATIN 10	0.256610369	0.047798058
RASGRP1	RAPAMYCIN	0.256604391	0.047803428
PTGER3	MK-2206	0.256291069	0.048085617
BCL6	Osimertinib	-0.256219577	0.048150196
BCL6	Fluorouracil	-0.255720343	0.048603134
BCL6	TAS-115	0.255453762	0.048846418
SCGB1A1	BLU-285	-0.255295942	0.048990913
CXCL13	PLX-8394	0.255212833	0.049067147
APOD	MI-219	0.255072305	0.049196268
PTGER3	AZD-7762	-0.254969025	0.049291342
BCL6	BAY-1217389	-0.254936845	0.049320996
RASGRP1	AZD-3514	-0.254867218	0.049385206
BCL6	VE-822	-0.254812914	0.049435334
SCGB1A1	GSK-461364	-0.254624537	0.049609545
APOD	Gandotinib	-0.254622252	0.049611661
CXCL13	E-7090	0.254446049	0.049775073
SDC1	Oxaliplatin	-0.254440692	0.049780048
SDC1	GSK-2126458	0.254403561	0.049814542
